# Supplementary material for: Discovery of New 2-Phenylamino-3-acyl-1,4-naphthoquinones as Inhibitors of Cancer Cells Proliferation: Searching for Intra-Cellular Targets Playing a Role in Cancer Cells Survival
Source: MDPI journal article supplement (doi:10.3390/molecules28114323), 2023-05-24
Supplement: s1 [file s1]

## **Supplementary Materials**

### **Discovery of New 2-Phenylamino-3-acyl-1,4-naphthoquinones as Inhibitors of Cancer Cells Proliferation: Searching for Intra- Cellular Targets Playing a Role in Cancer Cells Survival**

**Julio Benites, Jaime A. Valderrama, Álvaro Contreras, Cinthya Enríquez,  
Ricardo Pino-Rios, Osvaldo Yáñez and Pedro Buc Calderon**

2-(Phenylamino)-3-hexanoylnaphthalene-1,4-dione **1**.  $^1\text{H}$ -NMR and  $^{13}\text{C}$ -NMR

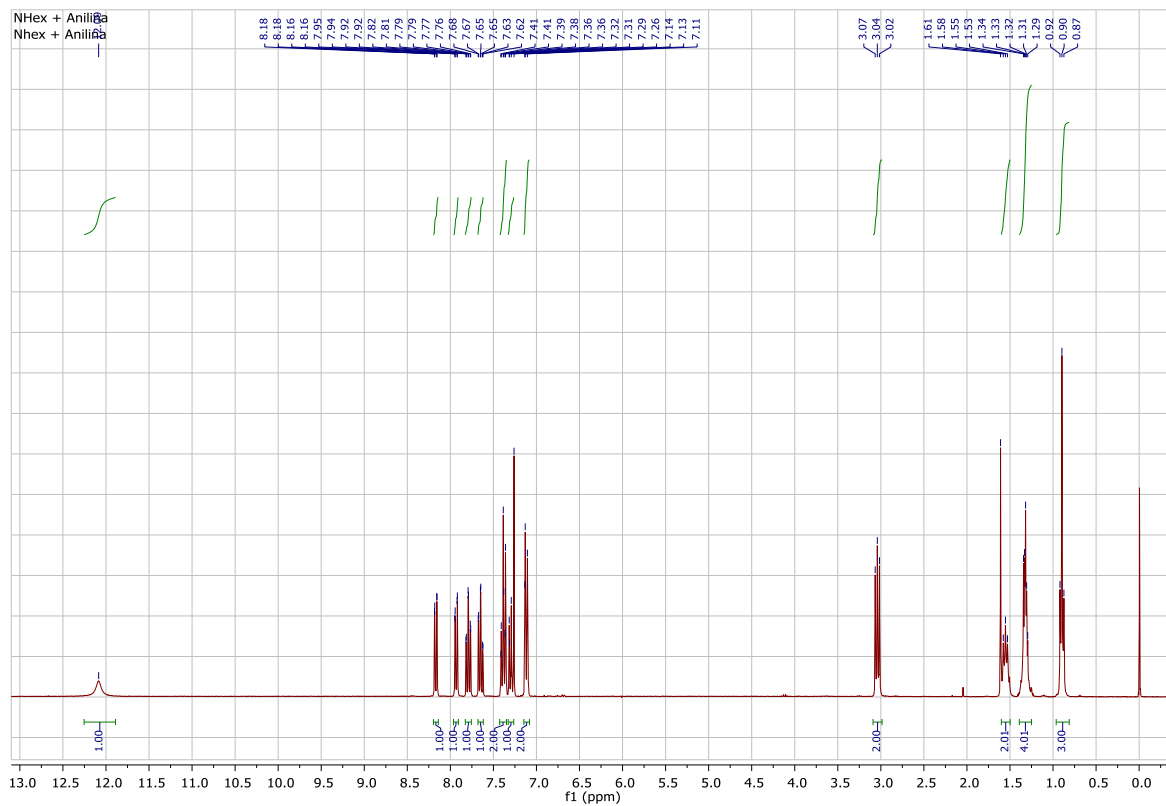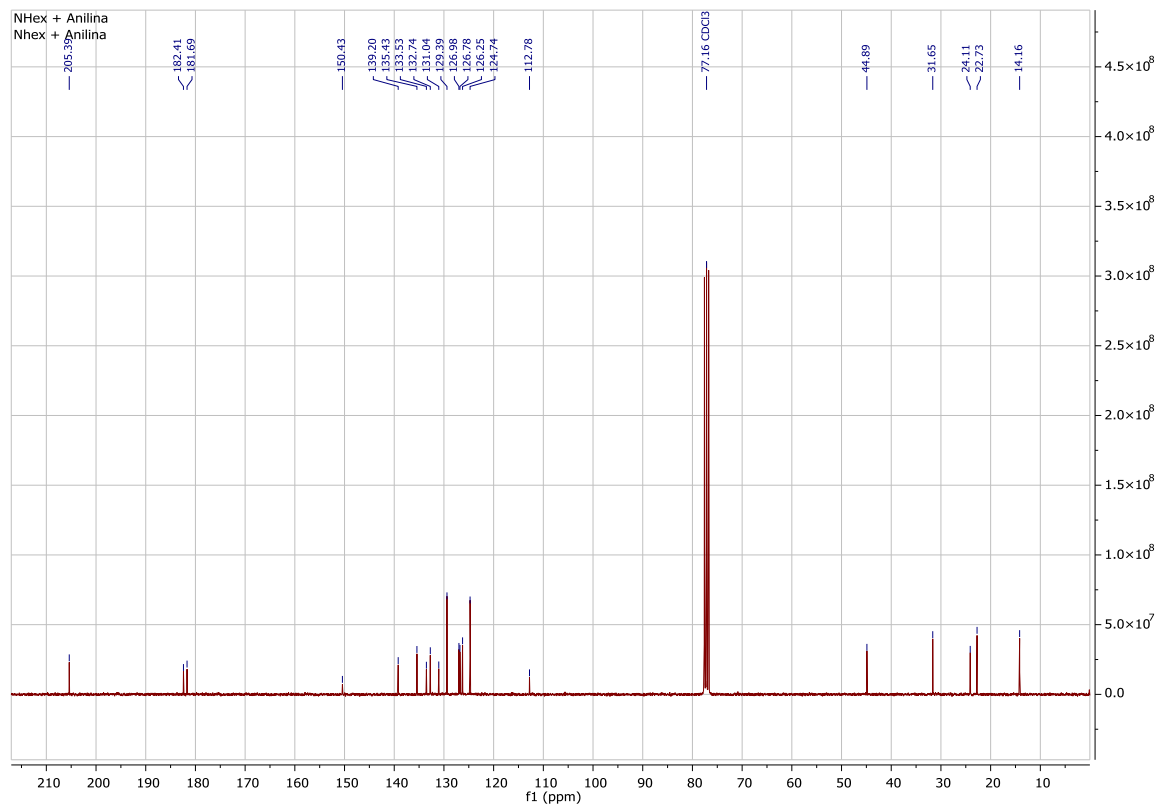

2-(Phenylamino)-3-decanoylnaphthalene-1,4-dione **2**.  $^1\text{H}$ -NMR and  $^{13}\text{C}$  NMR

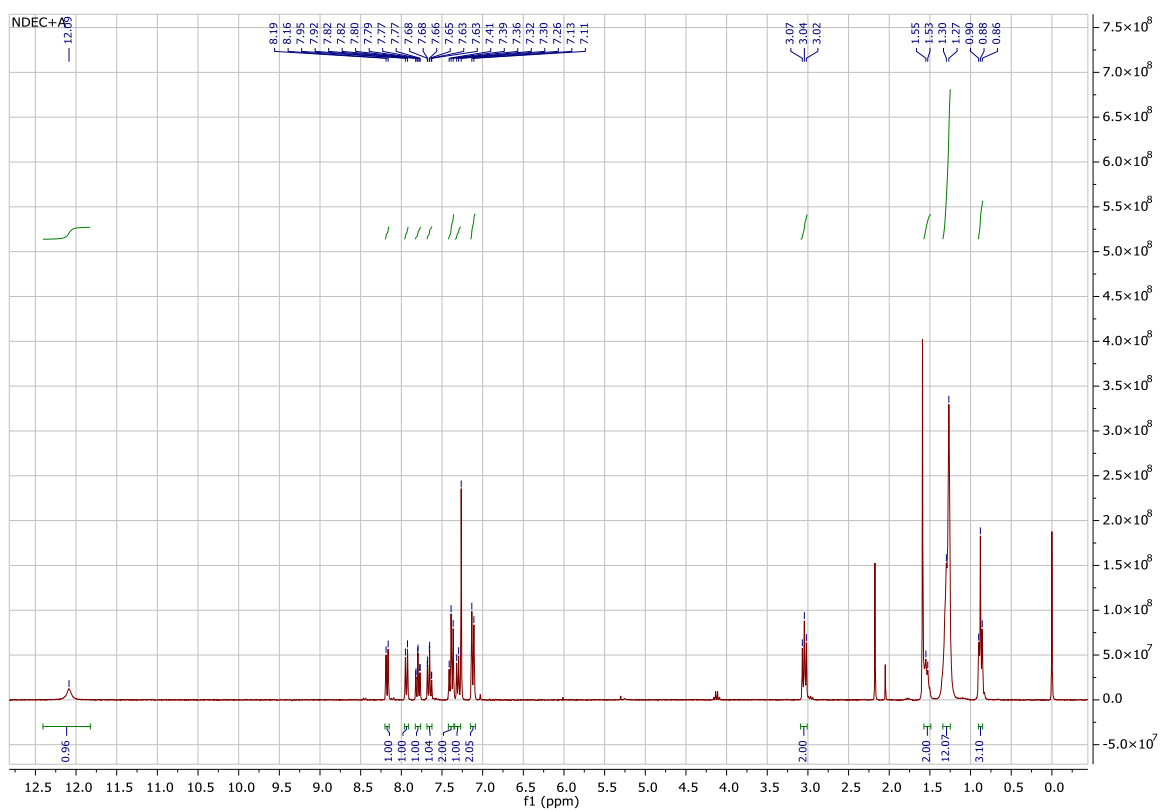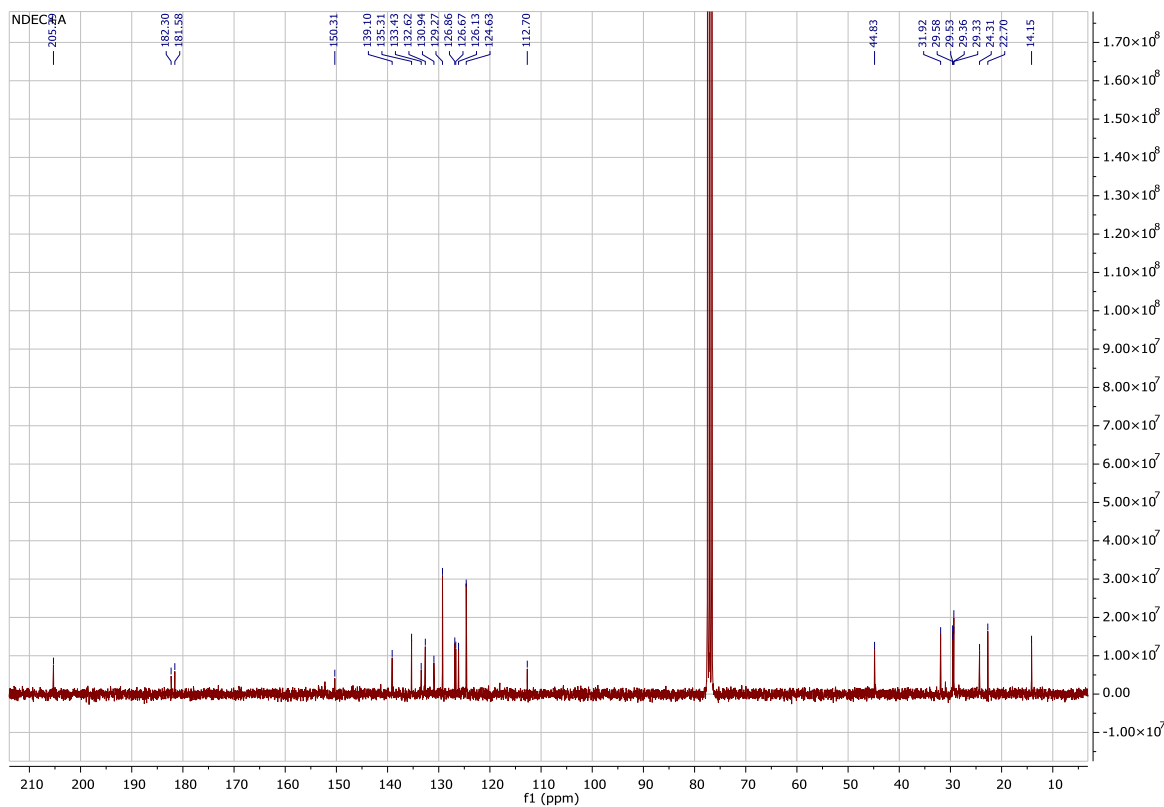

2-(Phenylamino)-3-dodecanoylnaphthalene-1,4-dione **3**.  $^1\text{H}$ -NMR and  $^{13}\text{C}$ -NMR

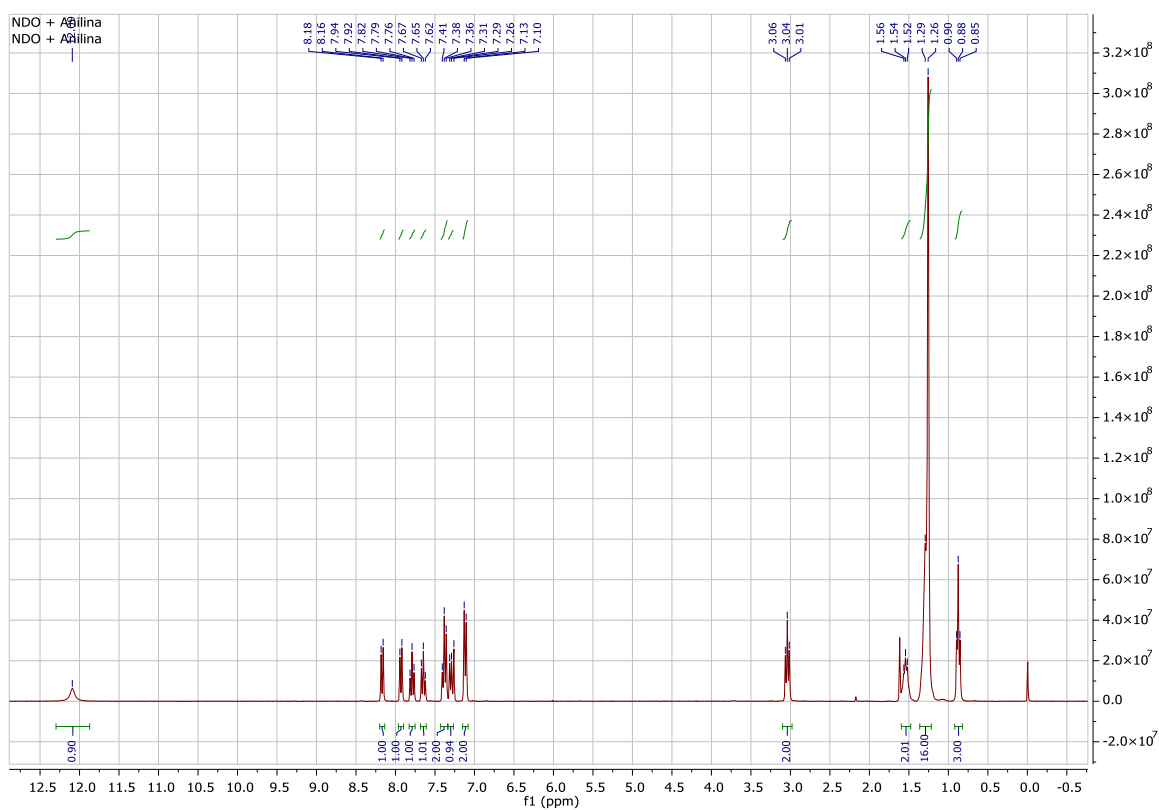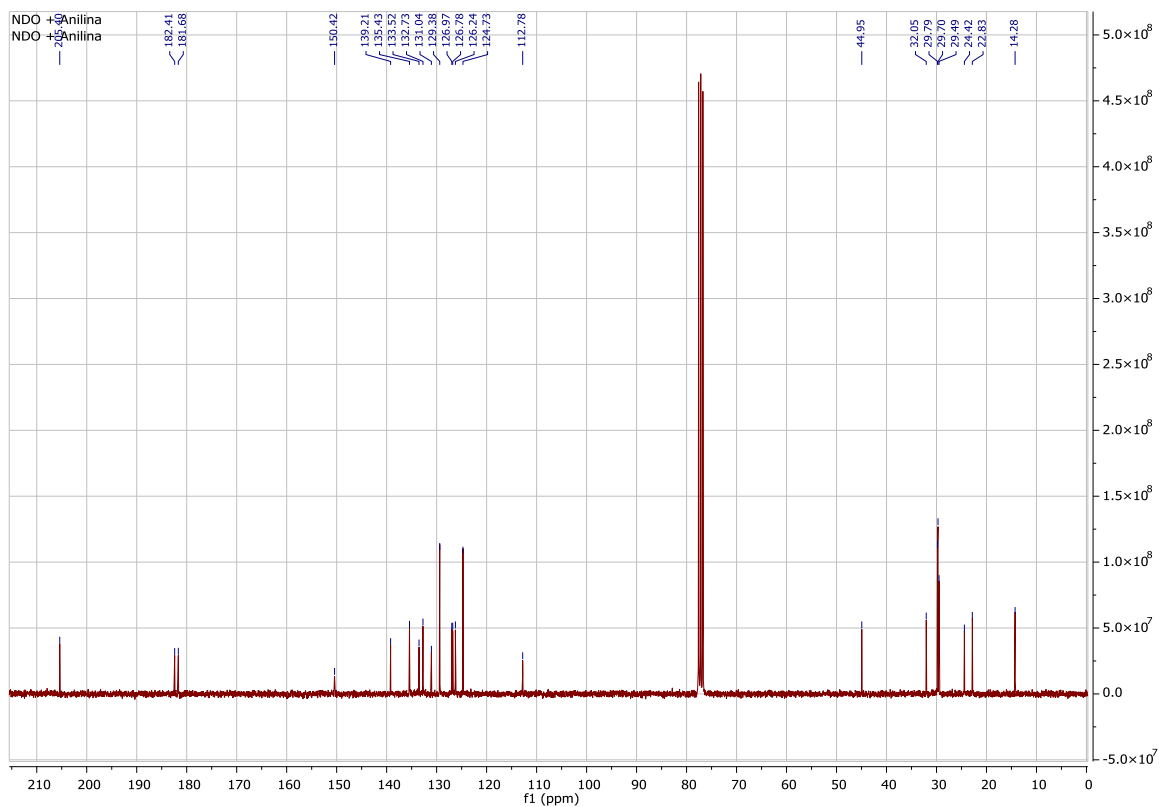

2-(Phenylamino)-3-benzoylnaphthalene-1,4-dione **4**.  $^1\text{H}$ -NMR and  $^{13}\text{C}$ -NMR

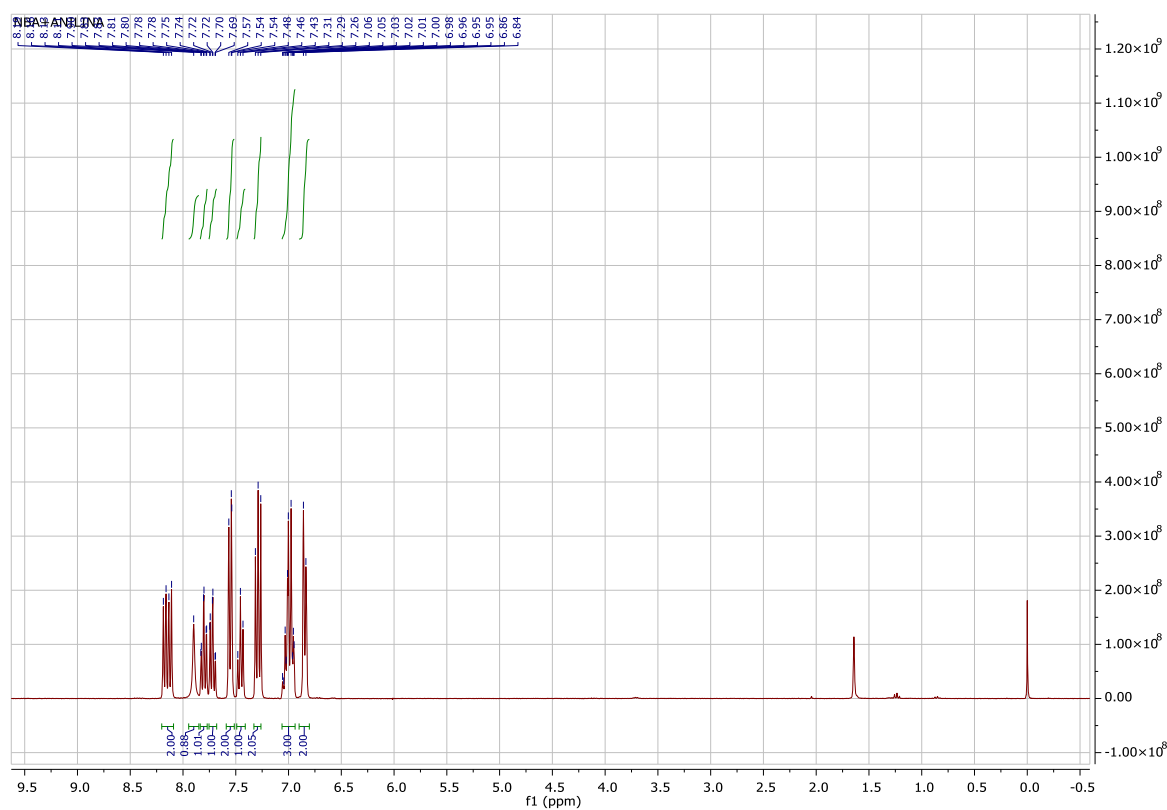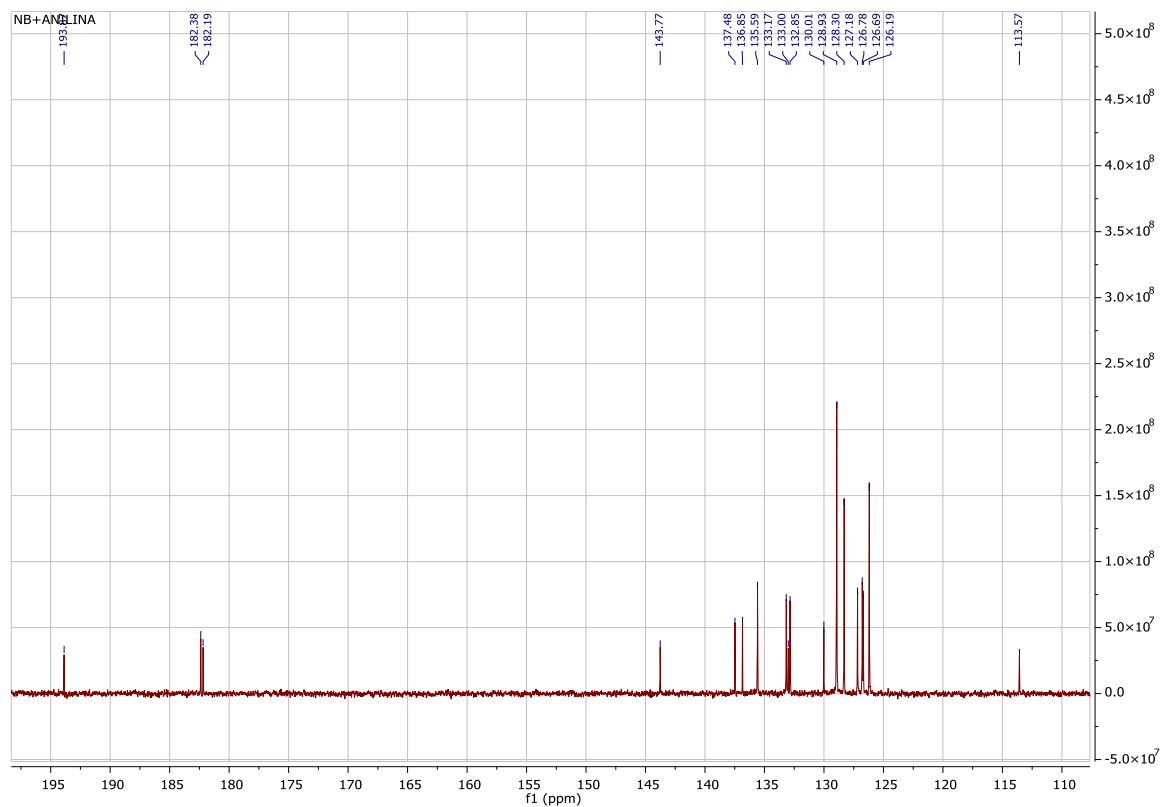

2-(phenylamino)-3-(3-methoxybenzoyl)naphthalene-1,4-dione **5**.  $^1\text{H}$ -NMR and  $^{13}\text{C}$ -NMR

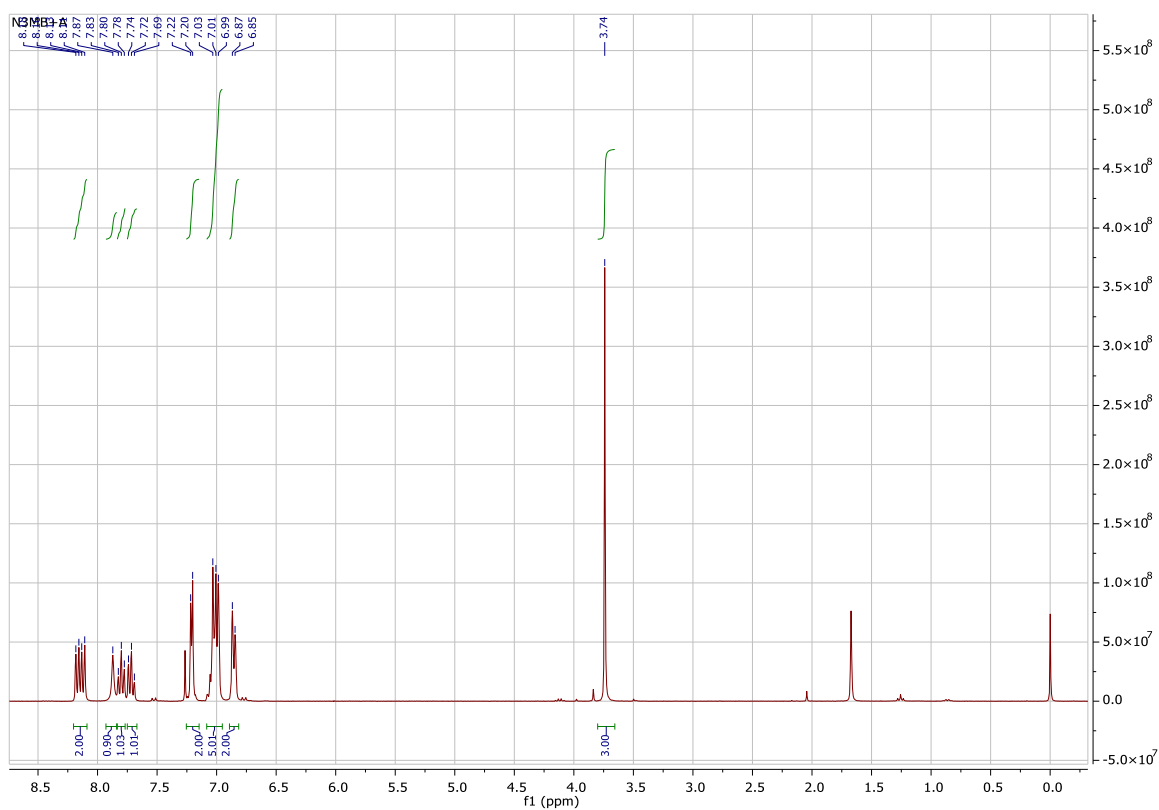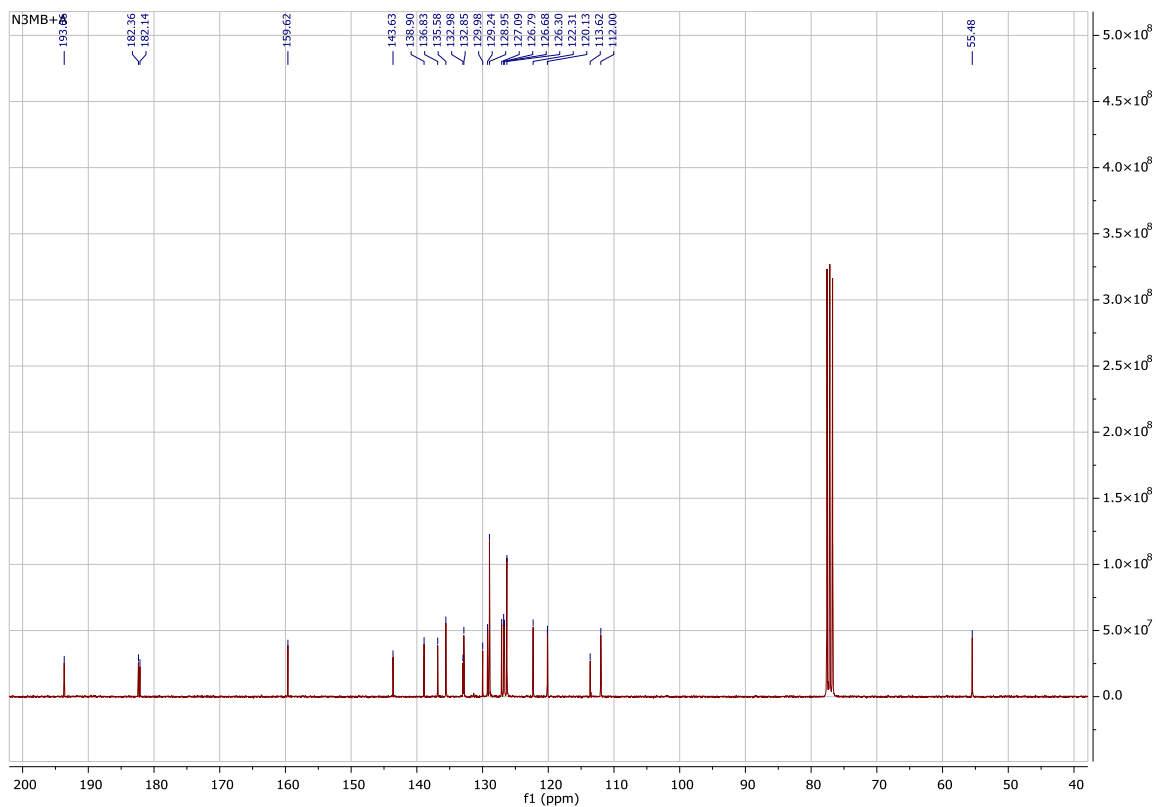

2-(Phenylamino)-3-(4-methoxybenzoyl)naphthalene-1,4-dione **6**.  $^1\text{H}$ -NMR and  $^{13}\text{C}$ -RMN

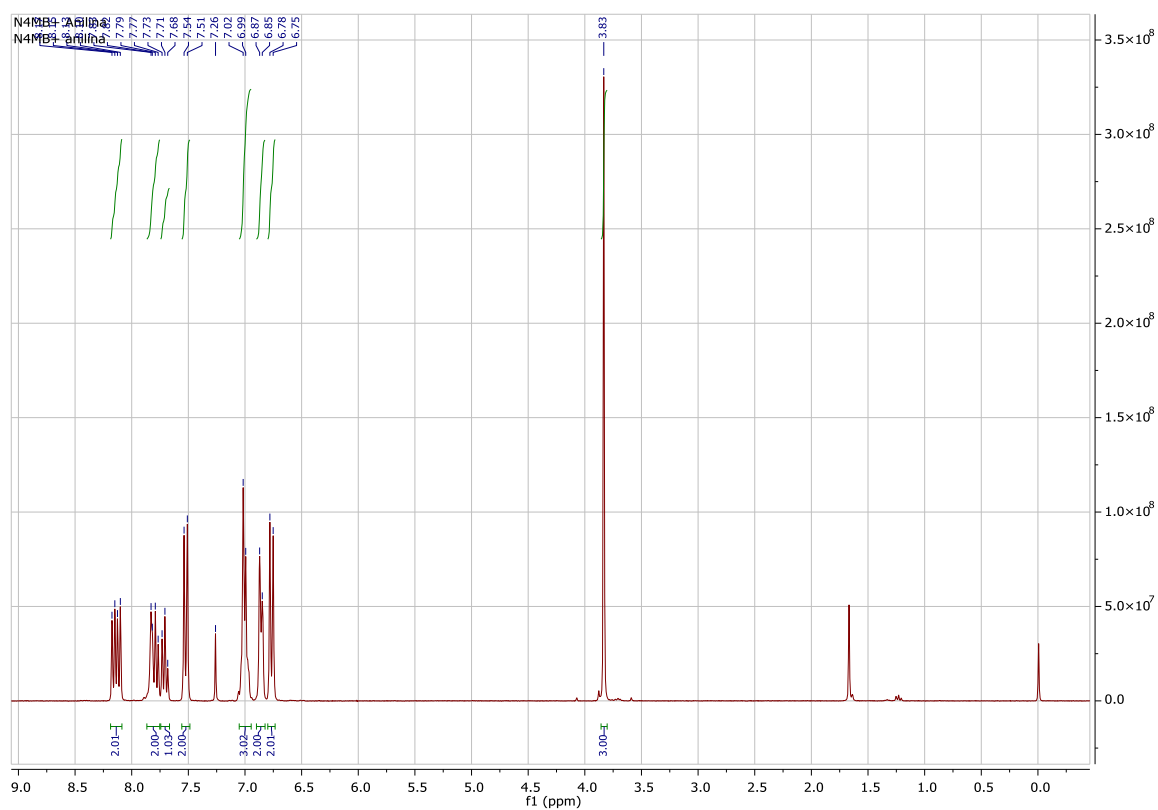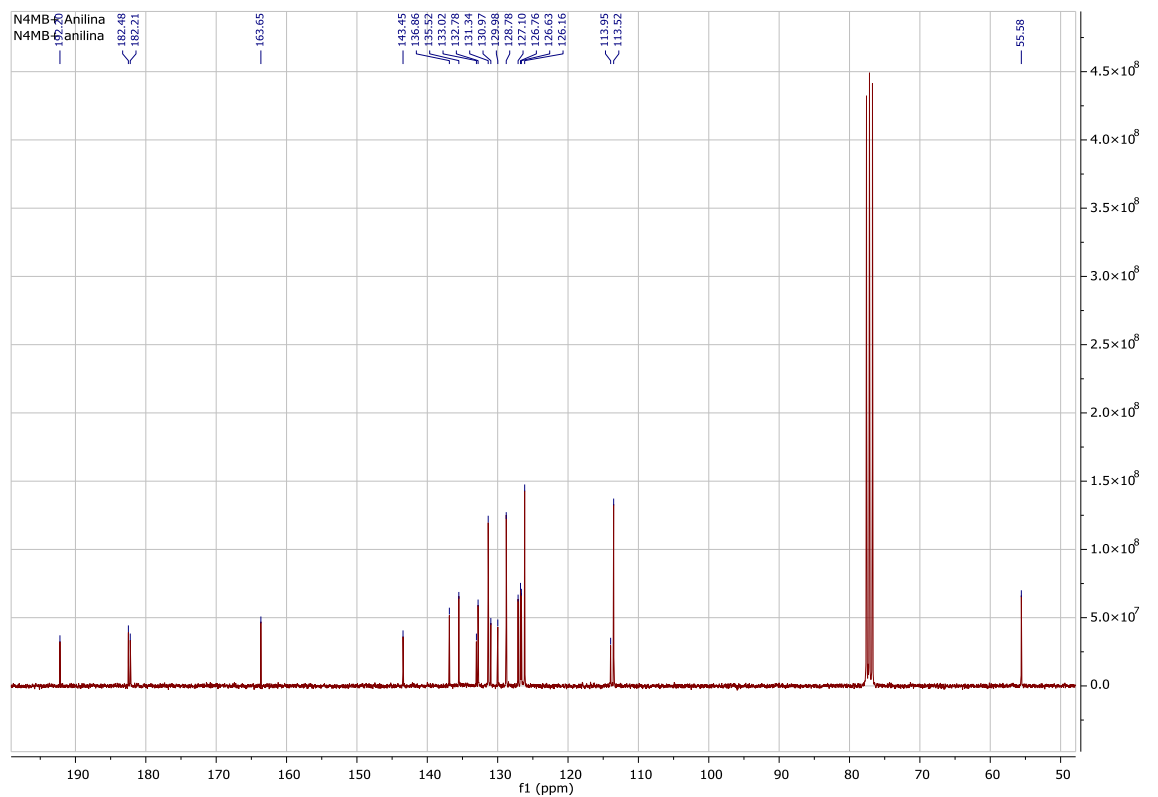

2-(Phenylamino)-3-(3,4-dimethoxybenzoyl)naphthalene-1,4-dione **7**.  $^1\text{H}$ -NMR and  $^{13}\text{C}$ -NMR

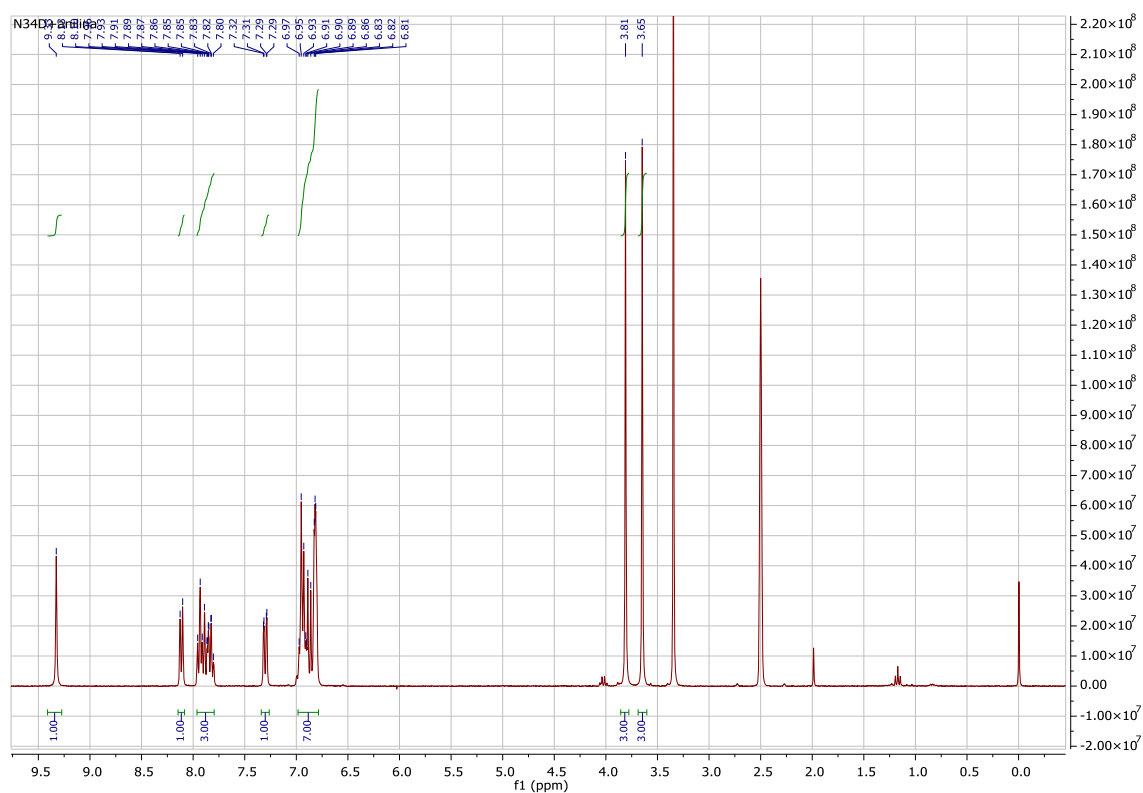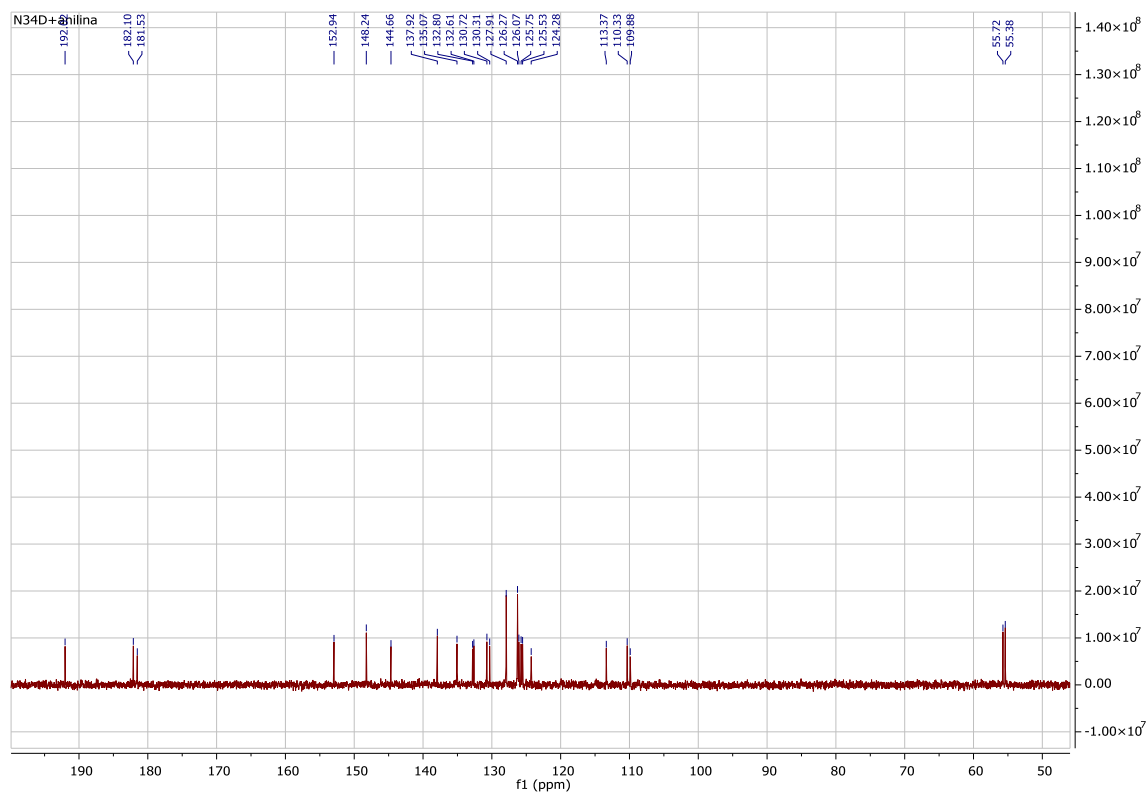

2-(Phenylamino)-3-(3,4,5-trimethoxybenzoyl)naphthalene-1,4-dione **8**.  $^1\text{H}$ -NMR and  $^{13}\text{C}$ -NMR

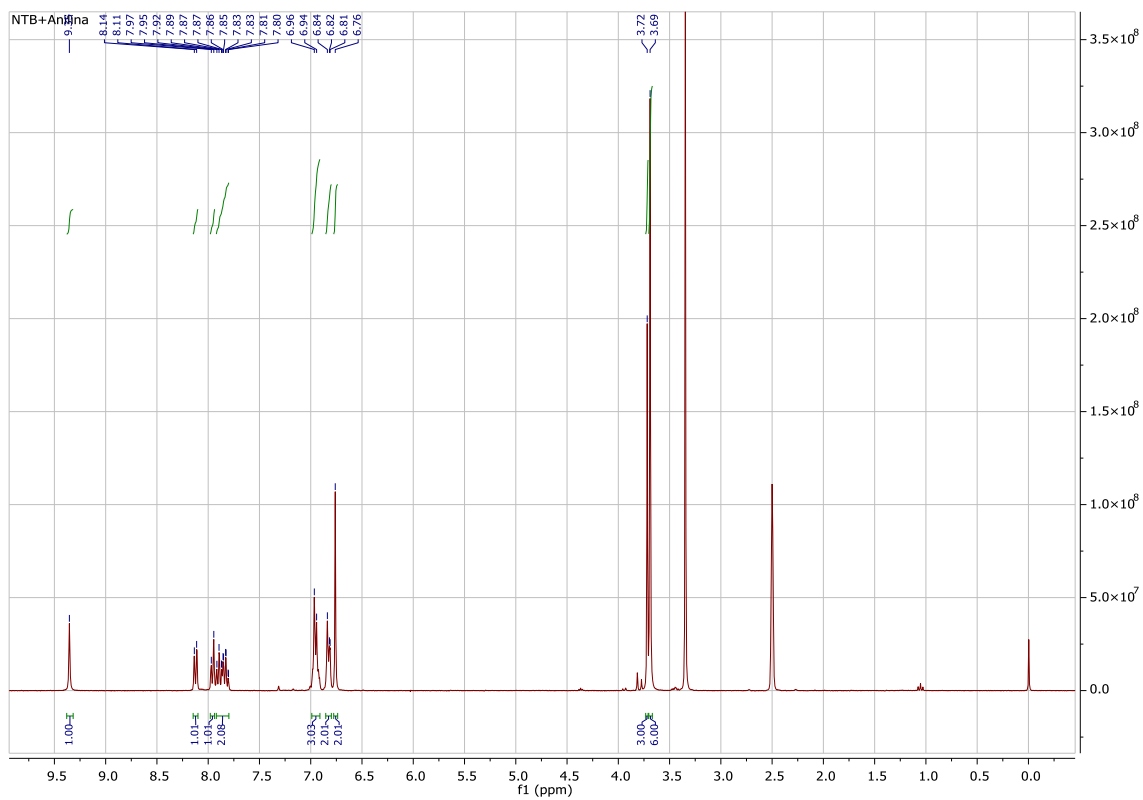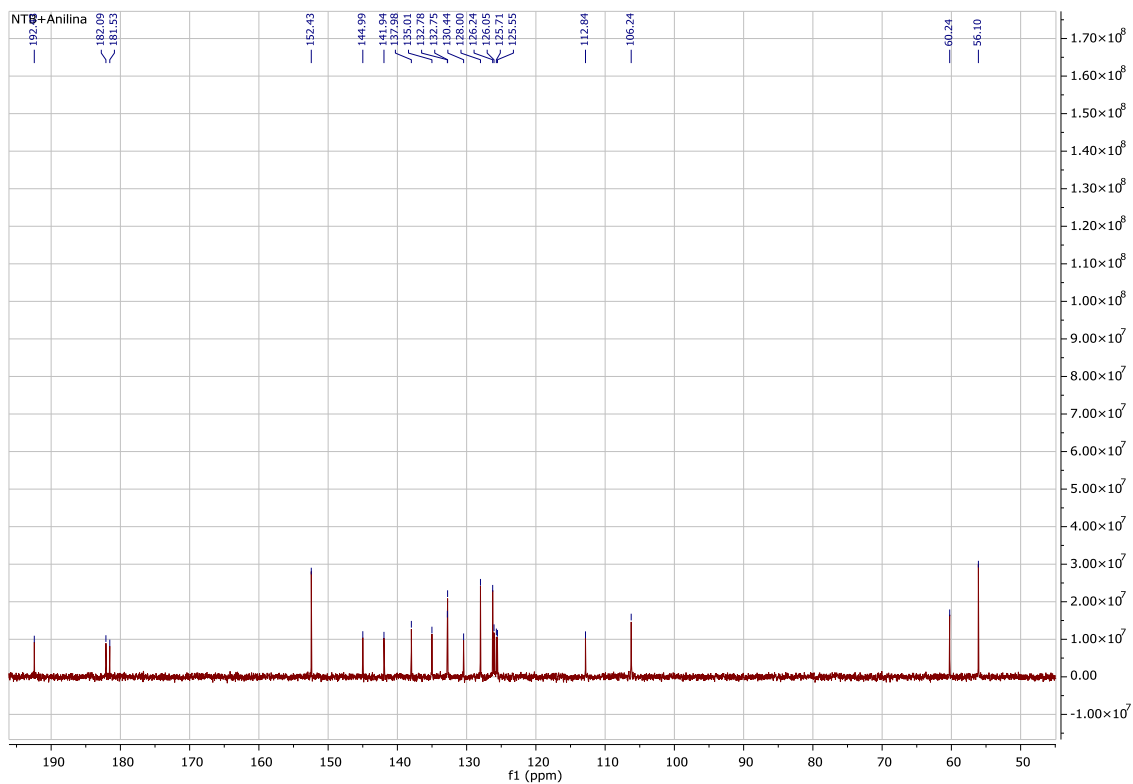

2-(Phenylamino)-3-(4-hydroxy-3-methoxybenzoyl)naphthalene-1,4-dione **9**.  $^1\text{H}$ -NMR and  $^{13}\text{C}$ -NMR

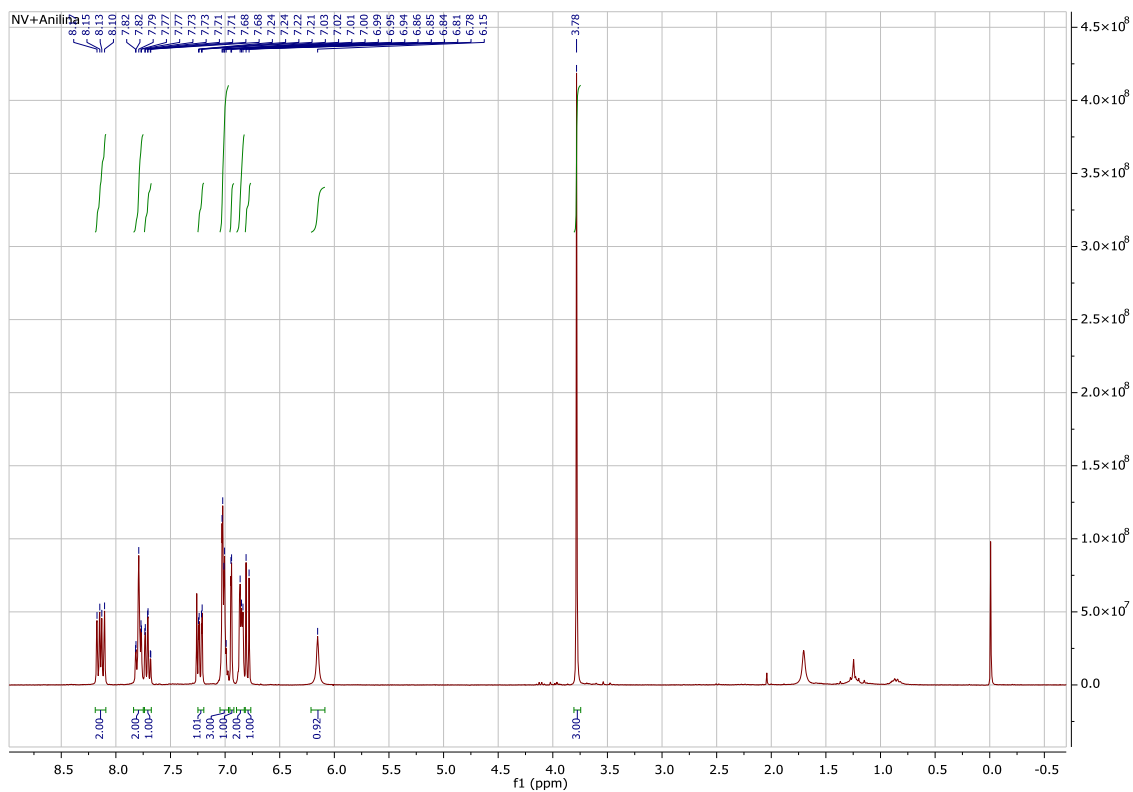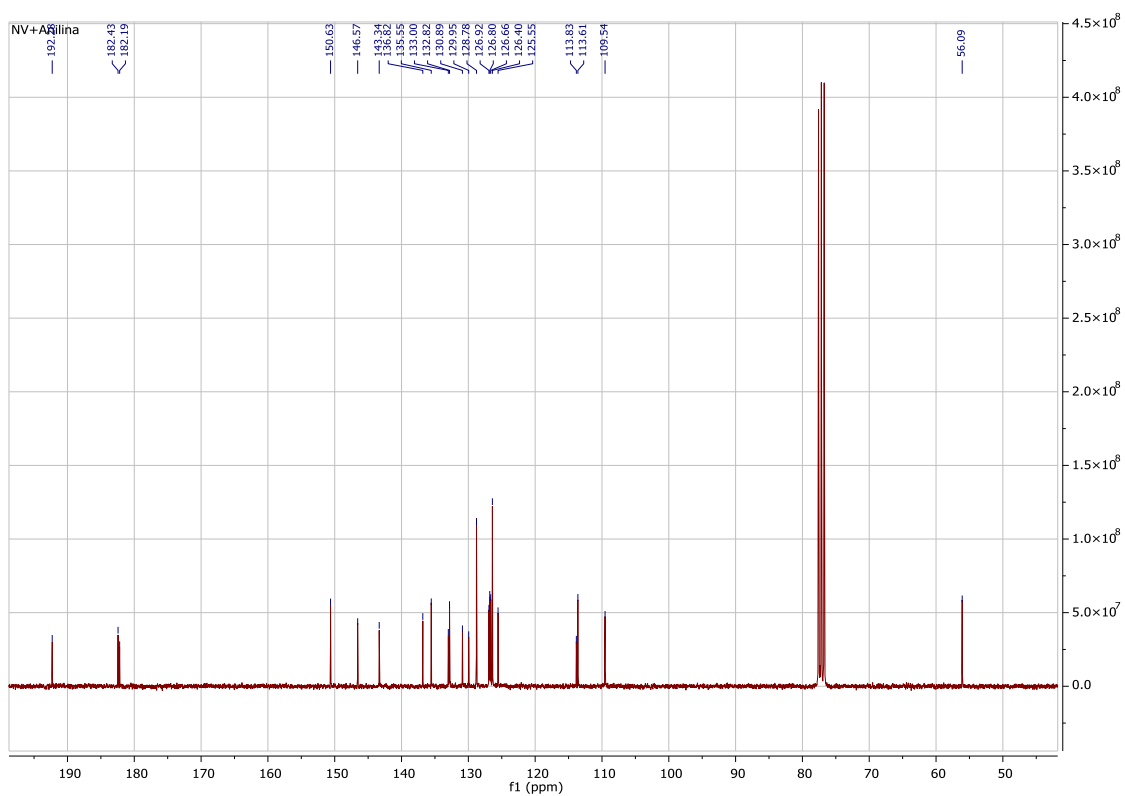

2-(Phenylamino)-3-(thiophene-3-carbonyl)naphthalene-1,4-dione **13**.  $^1\text{H}$ -NMR and  $^{13}\text{C}$ -NMR

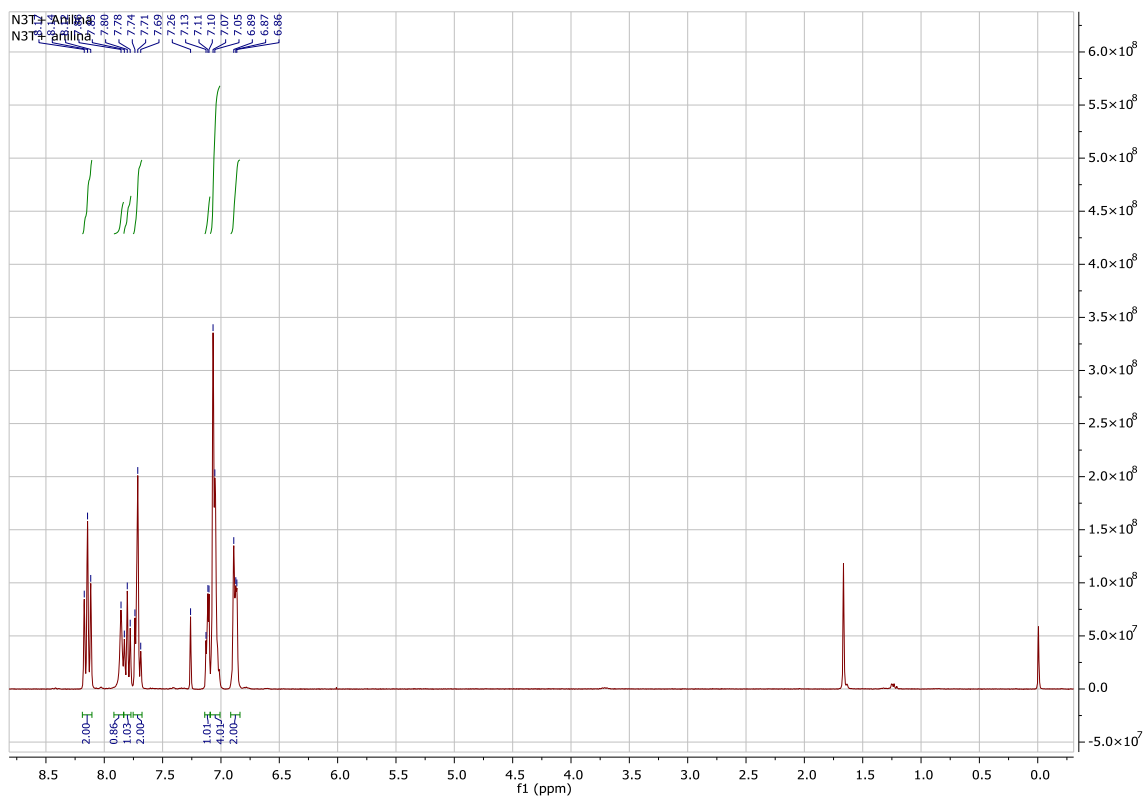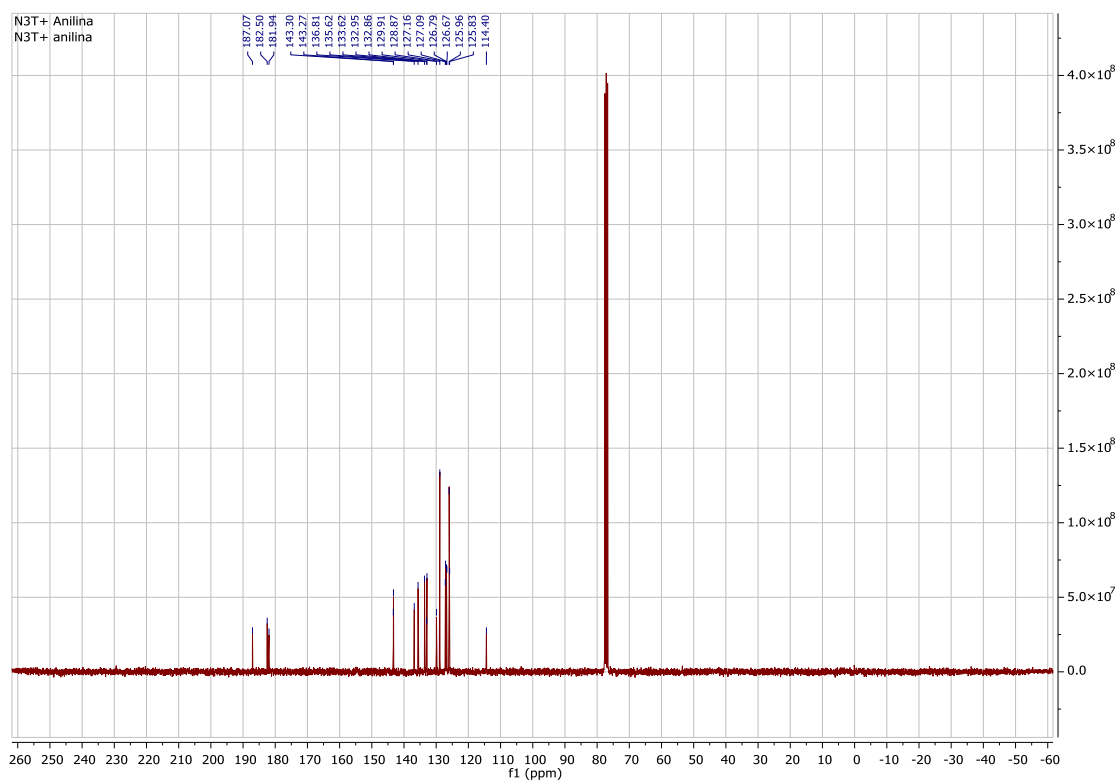

2-(Phenylamino)-3-(1H-pyrrole-2-carbonyl)naphthalene-1,4-dione **14**.  $^1\text{H}$ -NMR and  $^{13}\text{C}$ -NMR

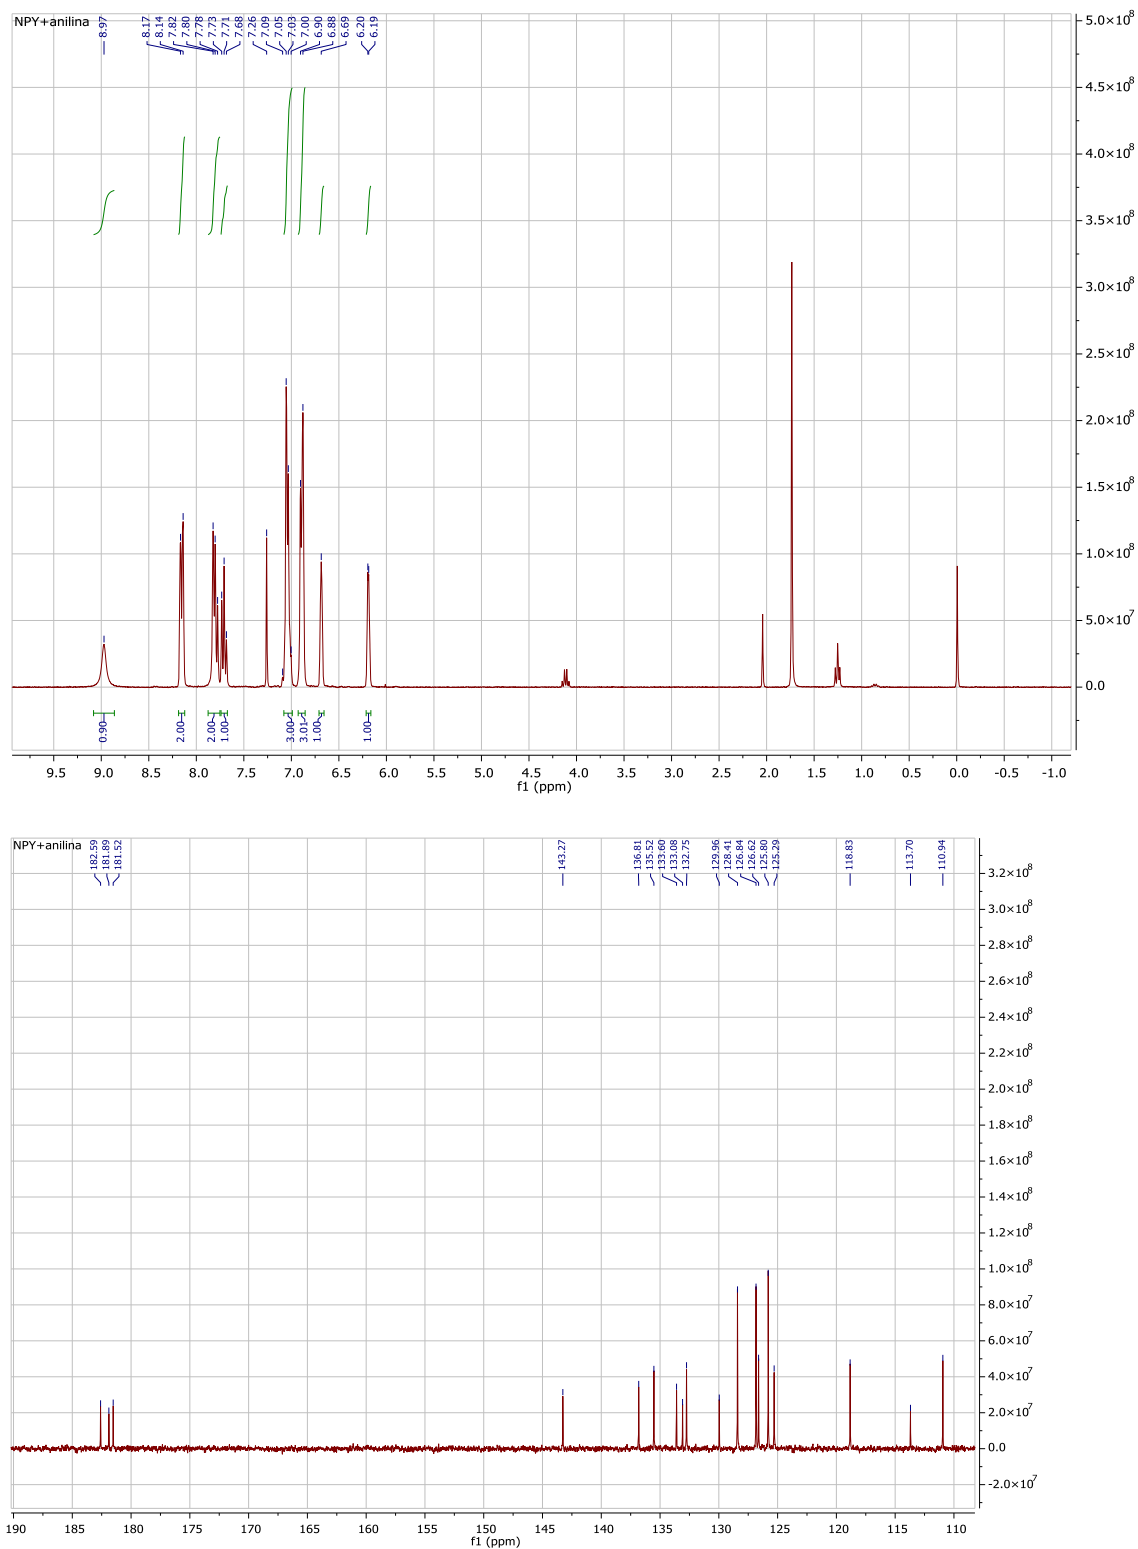

Figure S1.  $^1\text{H}$ - and  $^{13}\text{C}$ - NMR spectra of new synthesize compounds

## Comp 4- MCF-7

| Nonlin fit                                               | A                |
|----------------------------------------------------------|------------------|
|                                                          | MCF-7 Comp4      |
|                                                          | Y                |
| log(inhibitor) vs. normalized response -- Variable slope |                  |
| Best-fit values                                          |                  |
| LogIC50                                                  | 0.7178           |
| HillSlope                                                | -1.925           |
| IC50                                                     | 5.222            |
| Std. Error                                               |                  |
| LogIC50                                                  | 0.05491          |
| HillSlope                                                | 0.2801           |
| 95% Confidence Intervals                                 |                  |
| LogIC50                                                  | 0.6076 to 0.8281 |
| HillSlope                                                | -2.487 to -1.362 |
| IC50                                                     | 4.051 to 6.732   |
| Goodness of Fit                                          |                  |
| Degrees of Freedom                                       | 52               |
| R square                                                 | 0.9405           |
| Absolute Sum of Squares                                  | 5151             |
| Sy.x                                                     | 9.953            |
| Number of points                                         |                  |
| Analyzed                                                 | 54               |

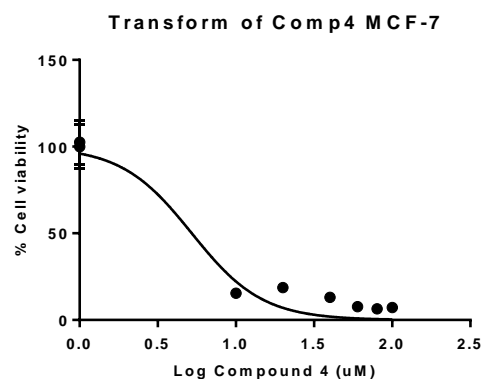

## Comp 4-T24

| Nonlin fit                                               | A                  |
|----------------------------------------------------------|--------------------|
|                                                          | Data Set-A         |
|                                                          | Y                  |
| log(inhibitor) vs. normalized response -- Variable slope |                    |
| Best-fit values                                          |                    |
| LogIC50                                                  | 1.221              |
| HillSlope                                                | -0.9122            |
| IC50                                                     | 16.64              |
| Std. Error                                               |                    |
| LogIC50                                                  | 0.02232            |
| HillSlope                                                | 0.04252            |
| 95% Confidence Intervals                                 |                    |
| LogIC50                                                  | 1.177 to 1.266     |
| HillSlope                                                | -0.9972 to -0.8273 |
| IC50                                                     | 15.02 to 18.44     |
| Goodness of Fit                                          |                    |
| Degrees of Freedom                                       | 66                 |
| R square                                                 | 0.9629             |
| Absolute Sum of Squares                                  | 2461               |
| Sy.x                                                     | 6.107              |
| Number of points                                         |                    |
| Analyzed                                                 | 68                 |

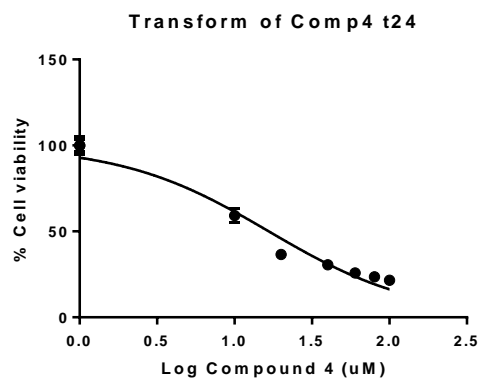

## Comp 4 – DU 145

| Nonlin fit                                               | A                   |
|----------------------------------------------------------|---------------------|
|                                                          | Data Set-A          |
|                                                          | Y                   |
| log(inhibitor) vs. normalized response -- Variable slope |                     |
| Best-fit values                                          |                     |
| LogIC50                                                  | -0.2250             |
| HillSlope                                                | -0.4817             |
| IC50                                                     | 0.5957              |
| Std. Error                                               |                     |
| LogIC50                                                  | 0.1067              |
| HillSlope                                                | 0.04291             |
| 95% Confidence Intervals                                 |                     |
| LogIC50                                                  | -0.4390 to -0.01087 |
| HillSlope                                                | -0.5678 to -0.3955  |
| IC50                                                     | 0.3639 to 0.9753    |
| Goodness of Fit                                          |                     |
| Degrees of Freedom                                       | 53                  |
| R square                                                 | 0.7308              |
| Absolute Sum of Squares                                  | 3165                |
| Sy.x                                                     | 7.727               |
| Number of points                                         |                     |
| Analyzed                                                 | 55                  |

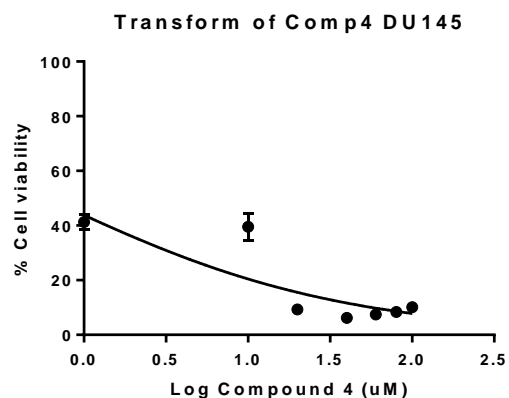

## Comp 4 – HEK 293

| Nonlin fit                                               | A                |
|----------------------------------------------------------|------------------|
|                                                          | Data Set-A       |
|                                                          | Y                |
| log(inhibitor) vs. normalized response -- Variable slope |                  |
| Best-fit values                                          |                  |
| LogIC50                                                  | 1.639            |
| HillSlope                                                | -1.236           |
| IC50                                                     | 43.53            |
| Std. Error                                               |                  |
| LogIC50                                                  | 0.01642          |
| HillSlope                                                | 0.07983          |
| 95% Confidence Intervals                                 |                  |
| LogIC50                                                  | 1.606 to 1.672   |
| HillSlope                                                | -1.397 to -1.076 |
| IC50                                                     | 40.35 to 46.97   |
| Goodness of Fit                                          |                  |
| Degrees of Freedom                                       | 54               |
| R square                                                 | 0.9527           |
| Absolute Sum of Squares                                  | 2200             |
| Sy.x                                                     | 6.383            |
| Number of points                                         |                  |
| Analyzed                                                 | 56               |

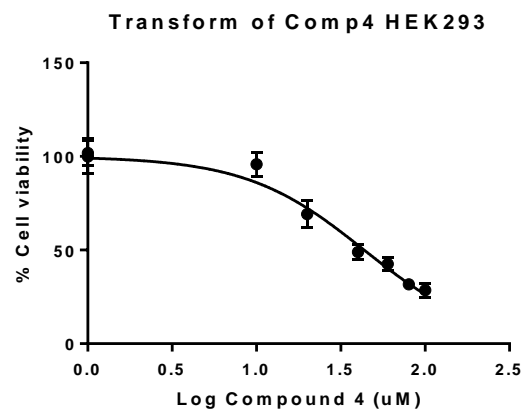

Figure S2. Graphing dose-response curves of compound 4

## Comp 11- MCF-7

| Nonlin fit                                               | A                |
|----------------------------------------------------------|------------------|
|                                                          | Data Set-A       |
|                                                          | Y                |
| log(inhibitor) vs. normalized response -- Variable slope |                  |
| Best-fit values                                          |                  |
| LogIC50                                                  | 0.7079           |
| HillSlope                                                | -2.012           |
| IC50                                                     | 5.104            |
| Std. Error                                               |                  |
| LogIC50                                                  | 0.02923          |
| HillSlope                                                | 0.1535           |
| 95% Confidence Intervals                                 |                  |
| LogIC50                                                  | 0.6494 to 0.7663 |
| HillSlope                                                | -2.319 to -1.705 |
| IC50                                                     | 4.461 to 5.839   |
| Goodness of Fit                                          |                  |
| Degrees of Freedom                                       | 60               |
| R square                                                 | 0.9833           |
| Absolute Sum of Squares                                  | 1516             |
| Sy.x                                                     | 5.027            |
|                                                          |                  |
| Number of points                                         |                  |
| Analyzed                                                 | 62               |

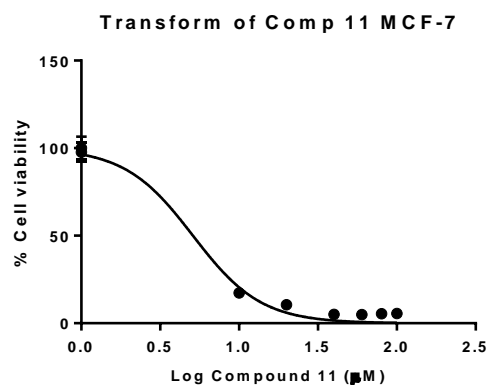

## Comp 11 – T24

| Nonlin fit                                               | A                |
|----------------------------------------------------------|------------------|
|                                                          | Data Set-A       |
|                                                          | Y                |
| log(inhibitor) vs. normalized response -- Variable slope |                  |
| Best-fit values                                          |                  |
| LogIC50                                                  | 1.037            |
| HillSlope                                                | -1.331           |
| IC50                                                     | 10.90            |
| Std. Error                                               |                  |
| LogIC50                                                  | 0.02204          |
| HillSlope                                                | 0.07164          |
| 95% Confidence Intervals                                 |                  |
| LogIC50                                                  | 0.9931 to 1.082  |
| HillSlope                                                | -1.475 to -1.187 |
| IC50                                                     | 9.842 to 12.06   |
| Goodness of Fit                                          |                  |
| Degrees of Freedom                                       | 54               |
| R square                                                 | 0.9795           |
| Absolute Sum of Squares                                  | 1509             |
| Sy.x                                                     | 5.286            |
|                                                          |                  |
| Number of points                                         |                  |
| Analyzed                                                 | 56               |

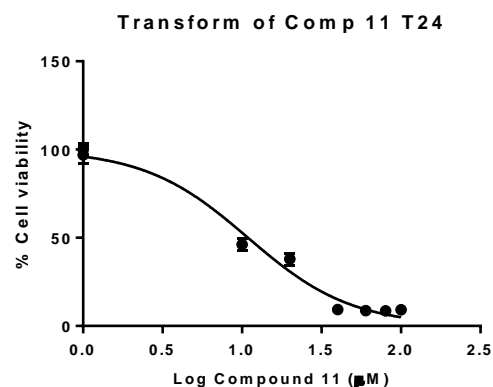

### Comp 11 – DU 145

| Nonlin fit                                               | A                |
|----------------------------------------------------------|------------------|
|                                                          | Data Set-A       |
|                                                          | Y                |
| log(inhibitor) vs. normalized response -- Variable slope |                  |
| Best-fit values                                          |                  |
| LogIC50                                                  | 0.6072           |
| HillSlope                                                | -2.306           |
| IC50                                                     | 4.048            |
| Std. Error                                               |                  |
| LogIC50                                                  | 0.03873          |
| HillSlope                                                | 0.1977           |
| 95% Confidence Intervals                                 |                  |
| LogIC50                                                  | 0.5297 to 0.6847 |
| HillSlope                                                | -2.701 to -1.910 |
| IC50                                                     | 3.386 to 4.838   |
| Goodness of Fit                                          |                  |
| Degrees of Freedom                                       | 59               |
| R square                                                 | 0.9772           |
| Absolute Sum of Squares                                  | 1821             |
| Sy.x                                                     | 5.555            |
| Number of points                                         |                  |
| Analyzed                                                 | 61               |

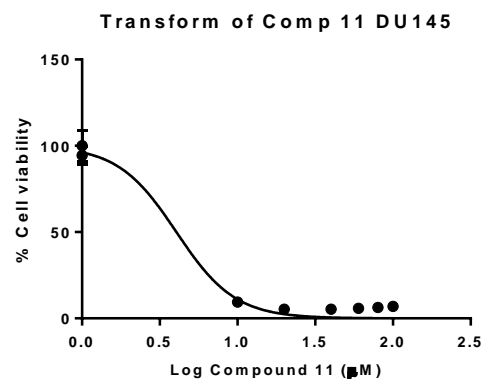

### Comp 11 – HEK 293

| Nonlin fit                                               | A                 |
|----------------------------------------------------------|-------------------|
|                                                          | Data Set-A        |
|                                                          | Y                 |
| log(inhibitor) vs. normalized response -- Variable slope |                   |
| Best-fit values                                          |                   |
| LogIC50                                                  | 2.226             |
| HillSlope                                                | -1.036            |
| IC50                                                     | 168.4             |
| Std. Error                                               |                   |
| LogIC50                                                  | 0.04462           |
| HillSlope                                                | 0.1066            |
| 95% Confidence Intervals                                 |                   |
| LogIC50                                                  | 2.136 to 2.316    |
| HillSlope                                                | -1.250 to -0.8214 |
| IC50                                                     | 136.9 to 207.0    |
| Goodness of Fit                                          |                   |
| Degrees of Freedom                                       | 49                |
| R square                                                 | 0.8628            |
| Absolute Sum of Squares                                  | 1374              |
| Sy.x                                                     | 5.296             |
| Number of points                                         |                   |
| Analyzed                                                 | 51                |

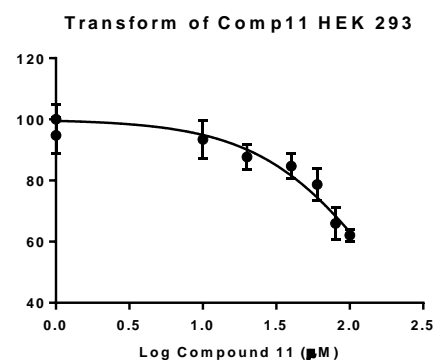

**Figure S3.** Graphing dose-response curves of compound 11

**Table S1.** Quantitative real-time (qPCR) Primer Sequences.

| Gene name                                            | Gene symbol   | Entrez Gene ID | Forward (5' → 3')        | Reverse (5' → 3')      | Amplicon Size (pb) |
|------------------------------------------------------|---------------|----------------|--------------------------|------------------------|--------------------|
| <b>Apoptosis</b>                                     |               |                |                          |                        |                    |
| Apoptosis regulator (BCL2), transcript variant alpha | <i>BCL2</i>   | NM_000633.2    | ATGTGTGTGGAGAGCGTCAA     | GAGACAGCCAGGAGAAATCAA  | 181                |
| <b>PI3 Kinases &amp; Phosphatases</b>                |               |                |                          |                        |                    |
| Mechanistic target of rapamycin kinase               | <i>MTOR</i>   | NM_004958.3    | TCCGAGAGATGAGTCAAGAGG    | CACCTTCCACTCCTATGAGGC  | 141                |
| <b>Drug metabolism/Oxidative stres</b>               |               |                |                          |                        |                    |
| Glutathione-disulfide reductase                      | <i>GSR</i>    | NM_000637.4    | CACTTGCGTGAATGTTGGATG    | TGGGATCACTCGTGAAGGCT   | 242                |
| <b>Cell Cycle</b>                                    |               |                |                          |                        |                    |
| Cell division cycle 25A                              | <i>CDC25A</i> | NM_001789.2    | TGGGCCATTGGACAGTAAAG     | TCCCAACAGCTTCTGAGGTA   | 76                 |
| Tumor protein p53                                    | <i>TP53</i>   | NM_000546.5    | ACAGCTTTGAGGTGCGTGTTT    | CCCTTTCTTGCGGAGATTCTCT | 77                 |
| <b>Hippo Signaling pathway</b>                       |               |                |                          |                        |                    |
| Cellular communication network factor 2              | <i>CCN2</i>   | NM_001901.2    | GTACCAGCAGAAAGGTTAGTATCA | GGTCAGTGAGCACGCTAAA    | 104                |
| <b>Histone Deacetylases</b>                          |               |                |                          |                        |                    |
| Histone deacetylase 4                                | <i>HDAC4</i>  | NM_006037.3    | AGCGTCCGTTGGATGTCAC      | CCTTCTCGTGCCACAAGTCT   | 169                |
| <b>Inflammation</b>                                  |               |                |                          |                        |                    |
| Tumor necrosis factor                                | <i>TNF</i>    | NM_000594.3    | AGAACTCACTGGGGCCTACA     | GCTCCGTGTCTCAAGGAAGT   | 177                |
| <b>Housekeeping</b>                                  |               |                |                          |                        |                    |
| Beta-2-microglobulin                                 | <i>B2M</i>    | NM_004048.2    | ATGAGTATGCCTGCCGTGTGA    | GGCATCTTCAAACCTCCATG   | 97                 |

**Table S2:** Full reports of SwissADME and pkCSM parameters

| SwissADME PARAMETERS                     |                                                                                   |                                                                                     |
|------------------------------------------|-----------------------------------------------------------------------------------|-------------------------------------------------------------------------------------|
| COMPOUND                                 | 4                                                                                 | 11                                                                                  |
| Structure                                | 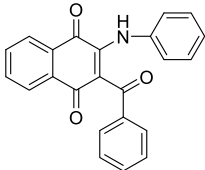 |  |
| PHYSICOCHEMICAL PROPERTIES               |                                                                                   |                                                                                     |
| Formula                                  | C <sub>23</sub> H <sub>15</sub> NO <sub>3</sub>                                   | C <sub>21</sub> H <sub>13</sub> NO <sub>4</sub>                                     |
| Molecular weight                         | 353.37 g/mol                                                                      | 343.33 g/mol                                                                        |
| Num. heavy atoms                         | 27                                                                                | 26                                                                                  |
| Num. arom. heavy atoms                   | 18                                                                                | 17                                                                                  |
| Fraction Csp <sup>3</sup>                | 0.00                                                                              | 0.00                                                                                |
| Num. rotatable bonds                     | 4                                                                                 | 4                                                                                   |
| Num. H-bond acceptors                    | 3                                                                                 | 4                                                                                   |
| Num. H-bond donors                       | 1                                                                                 | 1                                                                                   |
| Molar Refractivity                       | 102.79                                                                            | 95.05                                                                               |
| TPSA                                     | 63.24 Å <sup>2</sup>                                                              | 76.38 Å <sup>2</sup>                                                                |
| LIPOPHILICITY                            |                                                                                   |                                                                                     |
| Log <i>P</i> <sub>o/w</sub> (iLOGP)      | 2.56                                                                              | 2.19                                                                                |
| Log <i>P</i> <sub>o/w</sub> (XLOGP3)     | 5.49                                                                              | 4.70                                                                                |
| Log <i>P</i> <sub>o/w</sub> (WLOGP)      | 4.12                                                                              | 3.72                                                                                |
| Log <i>P</i> <sub>o/w</sub> (MLOGP)      | 2.14                                                                              | 0.91                                                                                |
| Log <i>P</i> <sub>o/w</sub> (SILICOS-IT) | 4.49                                                                              | 3.87                                                                                |
| Consensus Log <i>P</i> <sub>o/w</sub>    | 3.76                                                                              | 3.08                                                                                |
| WATER SOLUBILITY                         |                                                                                   |                                                                                     |
| Log <i>S</i> (ESOL)                      | -5.72                                                                             | -5.15                                                                               |
| Solubility                               | 6.75e-04 mg/mL; 1.91e-06 mol/L                                                    | 2.43e-03 mg/mL; 7.09e-06 mol/L                                                      |

|                                            |                                      |                                |
|--------------------------------------------|--------------------------------------|--------------------------------|
| Class                                      | Moderately soluble                   | Moderately soluble             |
| Log <i>S</i> (Ali)                         | -6.58                                | -6.03                          |
| Solubility                                 | 9.38e-05 mg/ml; 2.65e-07 mol/L       | 3.19e-04 mg/ml; 9.28e-07 mol/L |
| Class                                      | Poorly soluble                       | Poorly soluble                 |
| Log <i>S</i> (SILICOS-IT)                  | -8.25                                | -7.47                          |
| Solubility                                 | 2.01e-06 mg/mL; 5.68e-09 mol/L       | 1.17e-05 mg/mL; 3.41e-08 mol/L |
| Class                                      | Poorly soluble                       | Poorly soluble                 |
| PHARMACOKINETICS                           |                                      |                                |
| GI absorption                              | High                                 | High                           |
| BBB permeant                               | Yes                                  | Yes                            |
| P-gp substrate                             | No                                   | No                             |
| CYP1A2 inhibitor                           | Yes                                  | Yes                            |
| CYP2C19 inhibitor                          | Yes                                  | Yes                            |
| CYP2C9 inhibitor                           | Yes                                  | Yes                            |
| CYP2D6 inhibitor                           | No                                   | No                             |
| CYP3A4 inhibitor                           | Yes                                  | Yes                            |
| Log <i>K<sub>p</sub></i> (skin permeation) | -4.56 cm/s                           | -5.06 cm/s                     |
| DRUGLIKENESS                               |                                      |                                |
| Lipinski                                   | Yes; 0 violation                     | Yes; 0 violation               |
| Ghose                                      | Yes                                  | Yes                            |
| Veber                                      | Yes                                  | Yes                            |
| Egan                                       | Yes                                  | Yes                            |
| Muegge                                     | No; 1 violation: XLOGP3>5            | Yes                            |
| Bioavailability Score                      | 0.55                                 | 0.55                           |
| MEDICINAL CHEMISTRY                        |                                      |                                |
| PAINS                                      | 1 alert: quinone_A                   | 1 alert: quinone_A             |
| Brenk                                      | 1 alert: michael_acceptor_4          | 1 alert: michael_acceptor_4    |
| Leadlikeness                               | No; 2 violations: MW>350, XLOGP3>3.5 | No; 1 violation: XLOGP3>3.5    |

|                         |      |      |
|-------------------------|------|------|
| Synthetic accessibility | 3.13 | 3.34 |
|-------------------------|------|------|

---

| pkCSM PARAMETERS |  |  |
|------------------|--|--|
|------------------|--|--|

---

| ABSORPTION |  |  |
|------------|--|--|
|------------|--|--|

---

|                                                        |        |        |
|--------------------------------------------------------|--------|--------|
| Water solubility (log mol/L)                           | -4.677 | -4.035 |
| Caco2 permeability (log Papp in 10 <sup>-6</sup> cm/s) | 0.483  | 0.939  |
| Intestinal absorption (human) (% Absorbed)             | 94.39  | 94.324 |
| Skin Permeability (log Kp)                             | -2.774 | -2.798 |
| P-glycoprotein substrate                               | Yes    | Yes    |
| P-glycoprotein I inhibitor                             | Yes    | Yes    |
| P-glycoprotein II inhibitor                            | Yes    | Yes    |

---

| DISTRIBUTION |  |  |
|--------------|--|--|
|--------------|--|--|

---

|                               |        |        |
|-------------------------------|--------|--------|
| VDss (human) (log L/Kg)       | -0.105 | 0.013  |
| Fraction unbound (human) (Fu) | 0.016  | 0.06   |
| BBB permeability (log BB)     | 0.059  | -0.027 |
| CNS permeability (log PS)     | -1.738 | -1.864 |

---

| METABOLISM |  |  |
|------------|--|--|
|------------|--|--|

---

|                   |     |     |
|-------------------|-----|-----|
| CYP2D6 substrate  | No  | No  |
| CYP3A4 substrate  | Yes | Yes |
| CYP1A2 inhibitor  | Yes | Yes |
| CYP2C19 inhibitor | Yes | Yes |
| CYP2C9 inhibitor  | Yes | Yes |
| CYP2D6 inhibitor  | No  | No  |
| CYP3A4 inhibitor  | Yes | Yes |

---

| EXCRETION |  |  |
|-----------|--|--|
|-----------|--|--|

---

|                                 |       |       |
|---------------------------------|-------|-------|
| Total Clearance (log mL/min/Kg) | 0.138 | 0.138 |
| Renal OCT2 substrate            | No    | No    |

| TOXICITY                                                   |        |       |
|------------------------------------------------------------|--------|-------|
| AMES toxicity                                              | Yes    | No    |
| Max. tolerated dose<br>(human) (log mg/kg/day)             | 0.49   | 0.301 |
| hERG I inhibitor                                           | No     | No    |
| hERG II inhibitor                                          | Yes    | Yes   |
| Oral Rat Acute Toxicity<br>(LD50) (mol/kg)                 | 2.704  | 2.779 |
| Oral Rat Chronic Toxicity<br>(LOAEL) (log<br>mg/kg_bw/day) | 1.762  | 1.44  |
| Hepatotoxicity                                             | Yes    | No    |
| Skin Sensitization                                         | No     | No    |
| <i>T. Pyriformis</i> toxicity (log<br>ug/L)                | 0.404  | 0.63  |
| Minnow toxicity (log mM)                                   | -0.021 | 0.743 |
